# Supplementary material for: Impact of 2′-Fucosyllactose on Gut Microbiota Composition in Adults with Chronic Gastrointestinal Conditions: Batch Culture Fermentation Model and Pilot Clinical Trial Findings
Source: PubMed Central journal article supplement (PMC7998190; doi:10.3390/nu13030938), 2021-03-14
Supplement: nutrients-13-00938-s001.pdf [file nutrients-13-00938-s001.pdf]

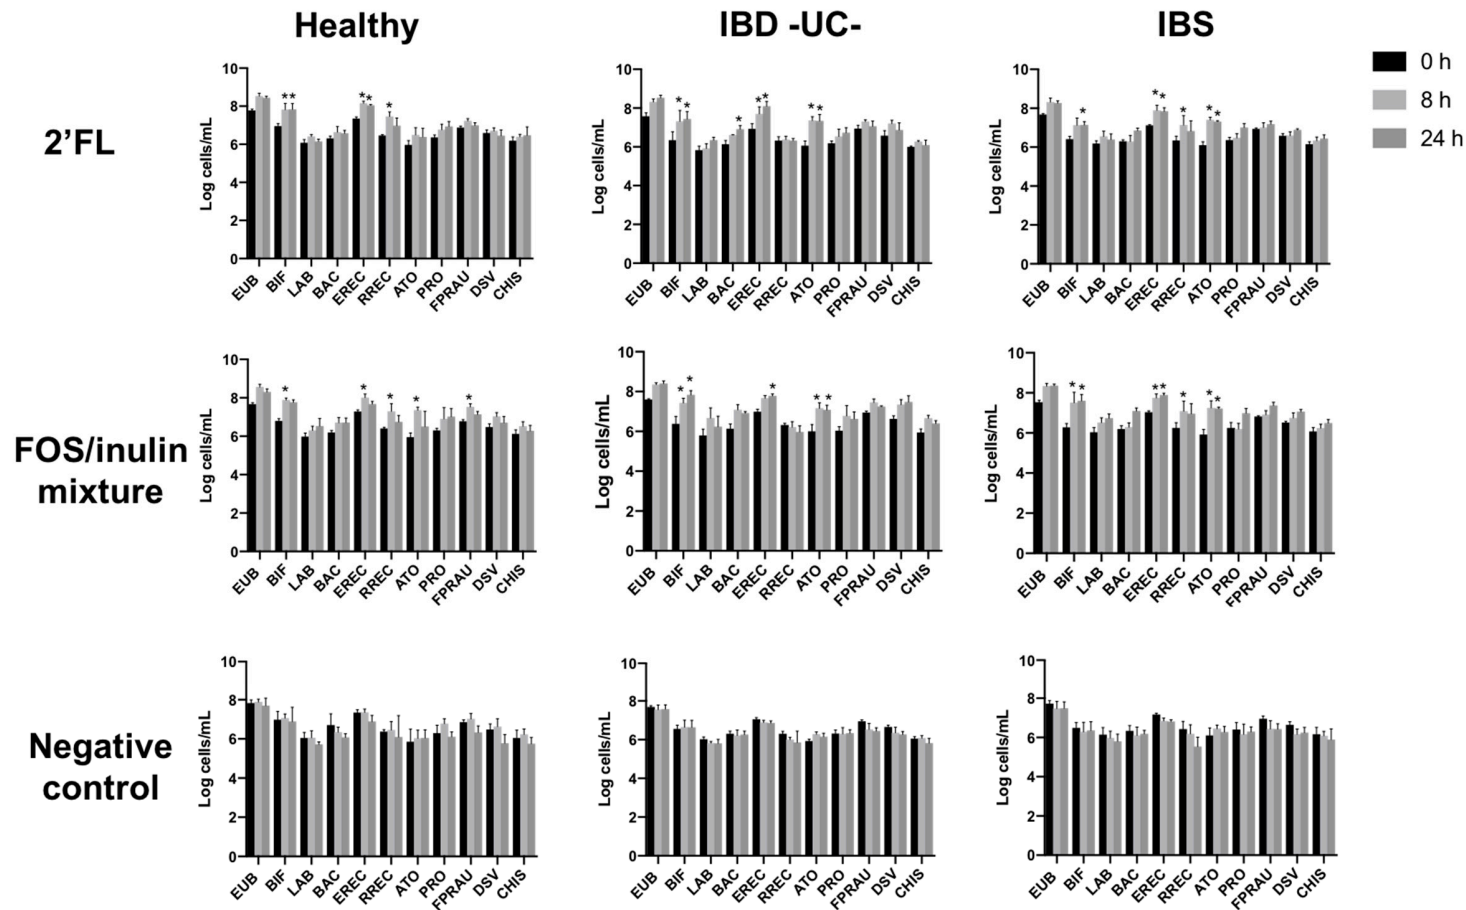

**Figure S1:** Bacterial populations at 0 h, 8 h, and 24 h of fermentation with no substrate/negative control (NC), positive control (FOS/inulin mixture) and the prebiotic 2'FL. Error bars show SEM (n=3). Significant differences from baseline (time 0) are denoted with\*(p ≤ 0.05 Eub -total bacteria-; Bif -*Bifidobacterium*-; Bac - *Bacteroides-Prevotella*-; Lab - *Lactobacillus-Enterococcus*-; Ato - *Atopobium* cluster-; Prop -propionate producing bacteria (Clostridium cluster IX)-; Erec - *Eubacterium rectale-Clostridium cocoides* group (*Clostridium* cluster XIVa and XIVb)-; Rrec- *Roseburia* spp -; Fprau - *Faecalibacterium prausnitzii* cluster -; Chis- *Clostridium histolyticum* group (*Clostridium* cluster I and II)-; DSV- *Desulfovibrionales* -.
